# Supplementary material for: Implementation of warm-cloud processes in a source-oriented WRF/Chem modelto study the effect of aerosol mixing state on fog formation in the Central Valley of California
Source: Copernicus journal article supplement (doi:10.5194/acp-16-8353-2016), 2016-07-12
Supplement: Supplementary file 1 [file acp-16-8353-2016-supplement.pdf]

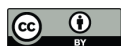

*Supplement of*

## **Implementation of warm-cloud processes in a source-oriented WRF/Chem model to study the effect of aerosol mixing state on fog formation in the Central Valley of California**

**Hsiang-He Lee et al.**

*Correspondence to:* Shu-Hua Chen (shachen@ucdavis.edu)

The copyright of individual parts of the supplement might differ from the CC-BY 3.0 licence.

Table S1. The mean size range for each AQC bin (S\_ARon\_CRmod) during 16 January to 18 January, 2011. (Units in  $\mu\text{m}$ )

|      |       |   |        |
|------|-------|---|--------|
| bin1 | 0.058 | ~ | 0.069  |
| bin2 | 0.122 | ~ | 0.139  |
| bin3 | 0.239 | ~ | 0.260  |
| bin4 | 0.480 | ~ | 0.507  |
| bin5 | 0.874 | ~ | 1.070  |
| bin6 | 0.914 | ~ | 1.886  |
| bin7 | 2.633 | ~ | 4.541  |
| bin8 | 5.695 | ~ | 10.844 |

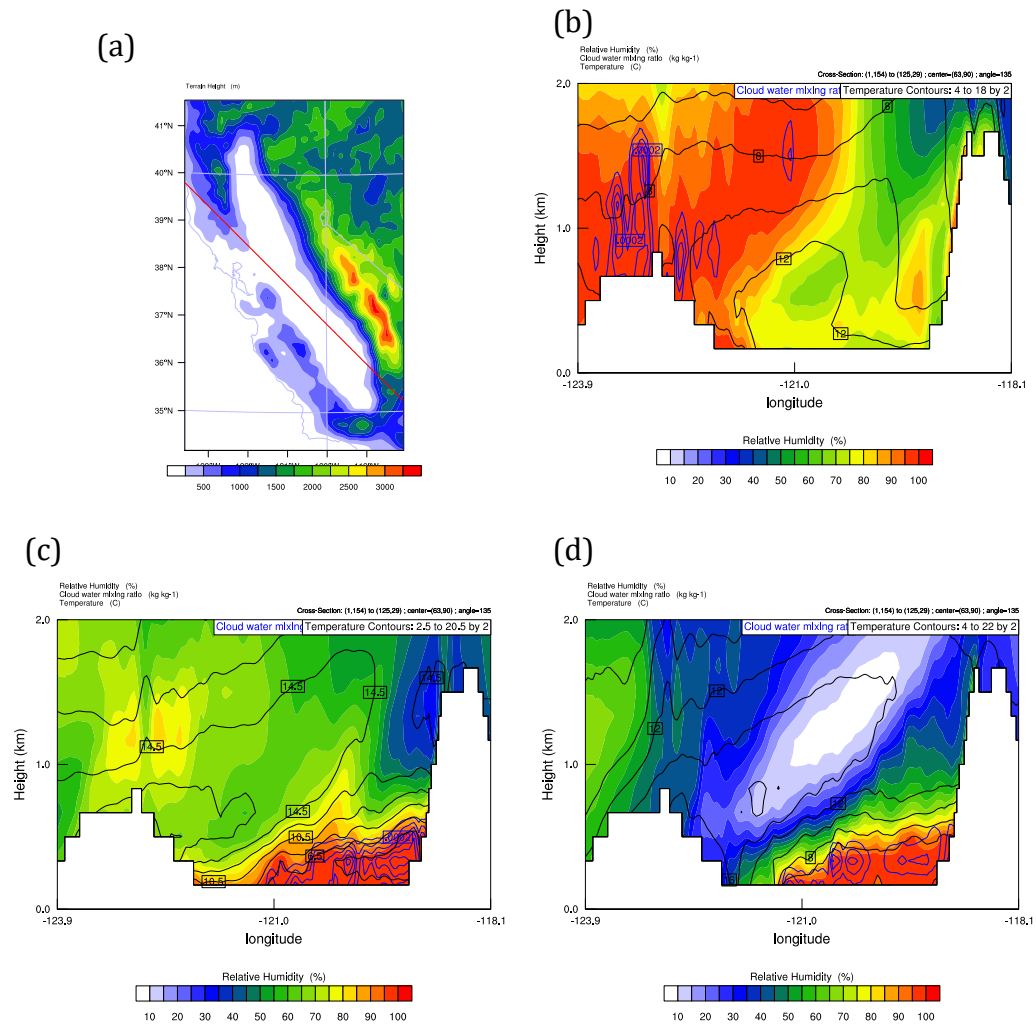

Figure S1. The vertical cross section of relative humidity (shaded color, %), cloud liquid water mass (blue lines, kg kg<sup>-1</sup>), and temperature (black lines, degree C) at 0000 UTC (4 PM local time) (b) 14 January, (c) 17 January, and (d) 19 January, along the red line in (a). The results are from S\_ARon\_CRmod.

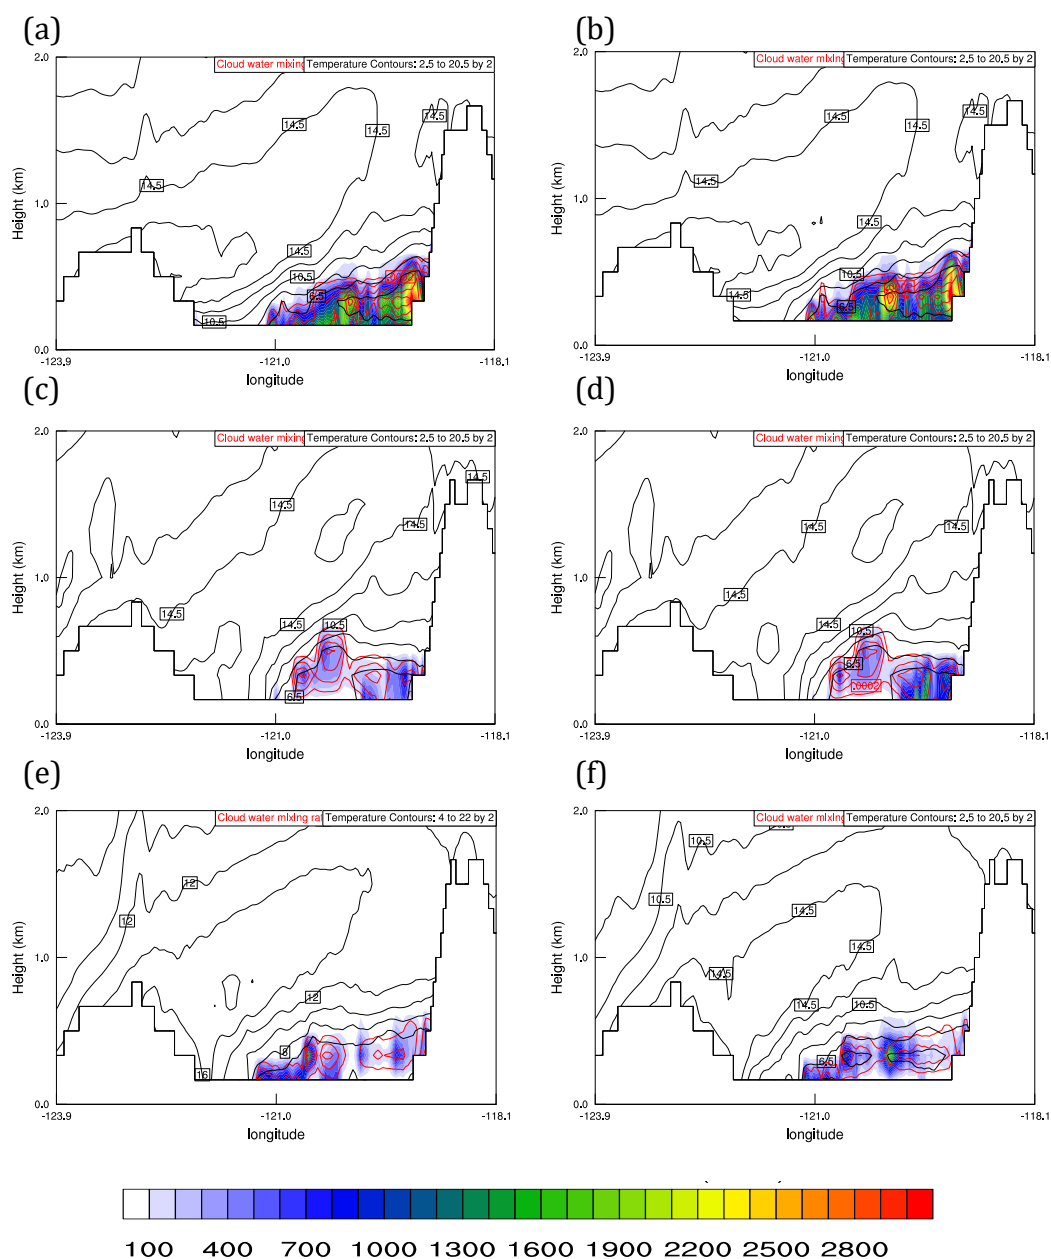

Figure S2. The vertical cross section of CCN number concentration, cloud liquid water mass (red lines,  $\text{kg kg}^{-1}$ ), and temperature (black lines, degree C) at 0000 UTC (4 PM local time) (a, b) 17 January, (c, d) 18 January, and (d, e) 19 January, along the red line in Fig. S1 (a). (a), (c) and (e) are from S\_Aron\_CRmod. (b), (d) and (f) are from I\_Aron\_CRmod.

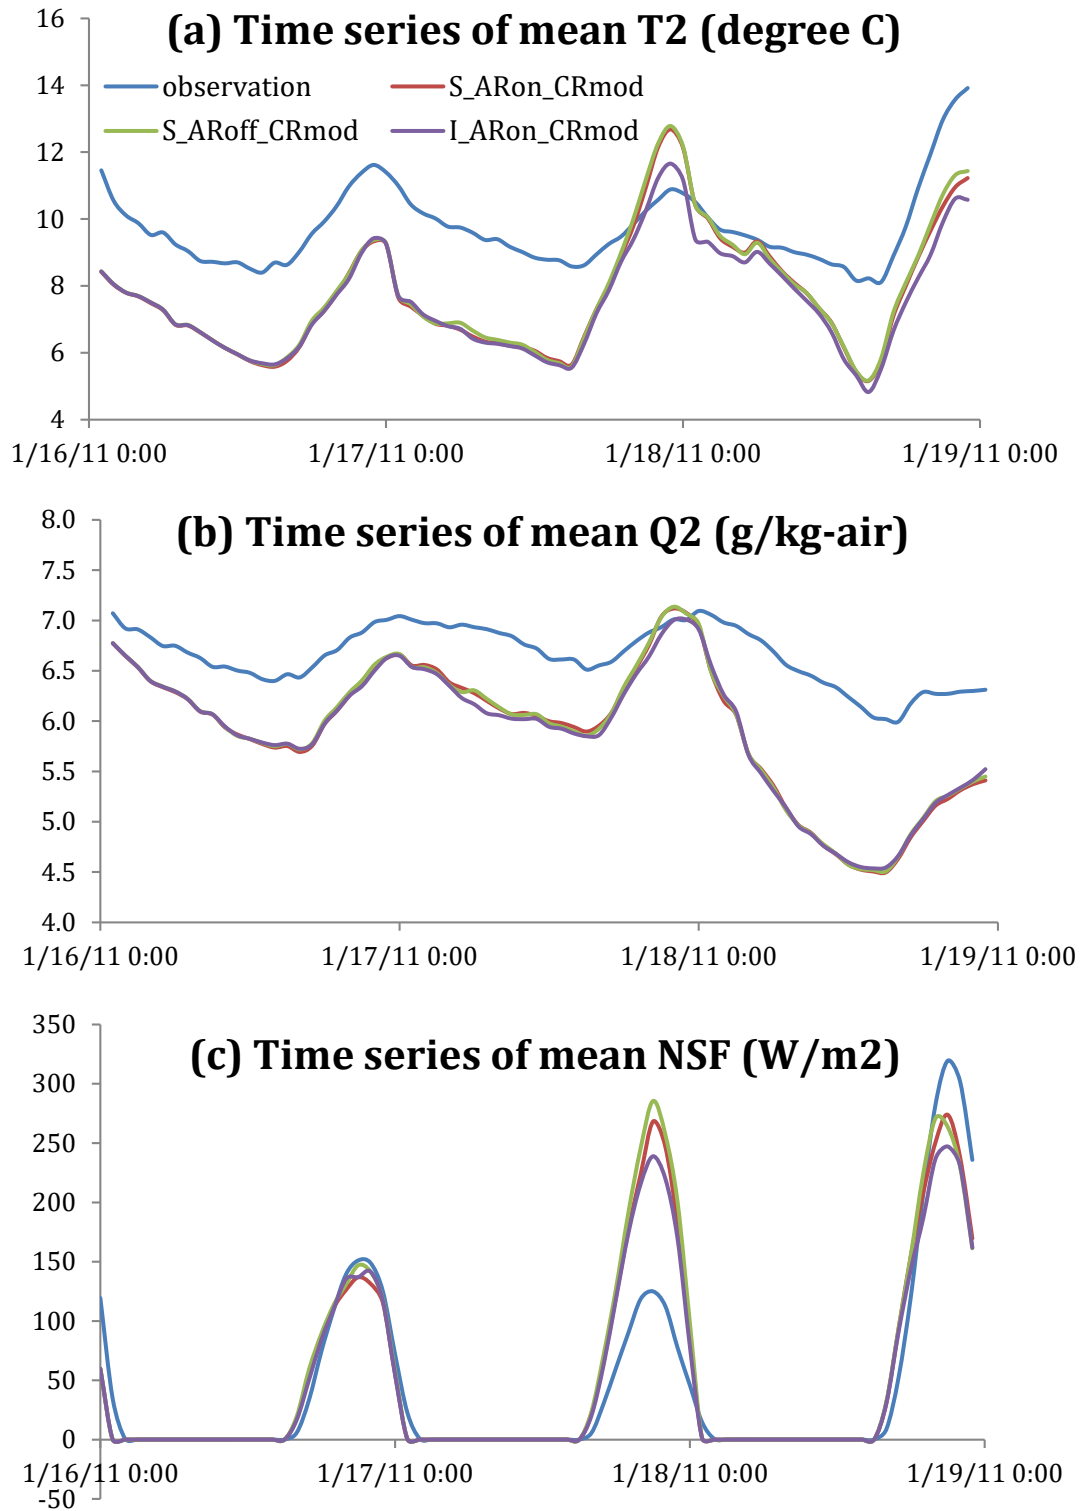

Figure S3. Time series variation of (a) mean 2-m temperature (T2), (b) mean 2-m water vapor mixing ratio (Q2), and (c) mean surface net downward shortwave radiation (NSF) from observations and model simulations from 16 to 18 January 2011.
